# Supplementary material for: A novel superfamily containing the β-grasp fold involved in binding diverse soluble ligands
Source: PubMed Central journal article supplement (PMC1796856; doi:10.1186/1745-6150-2-4), 2007-01-24

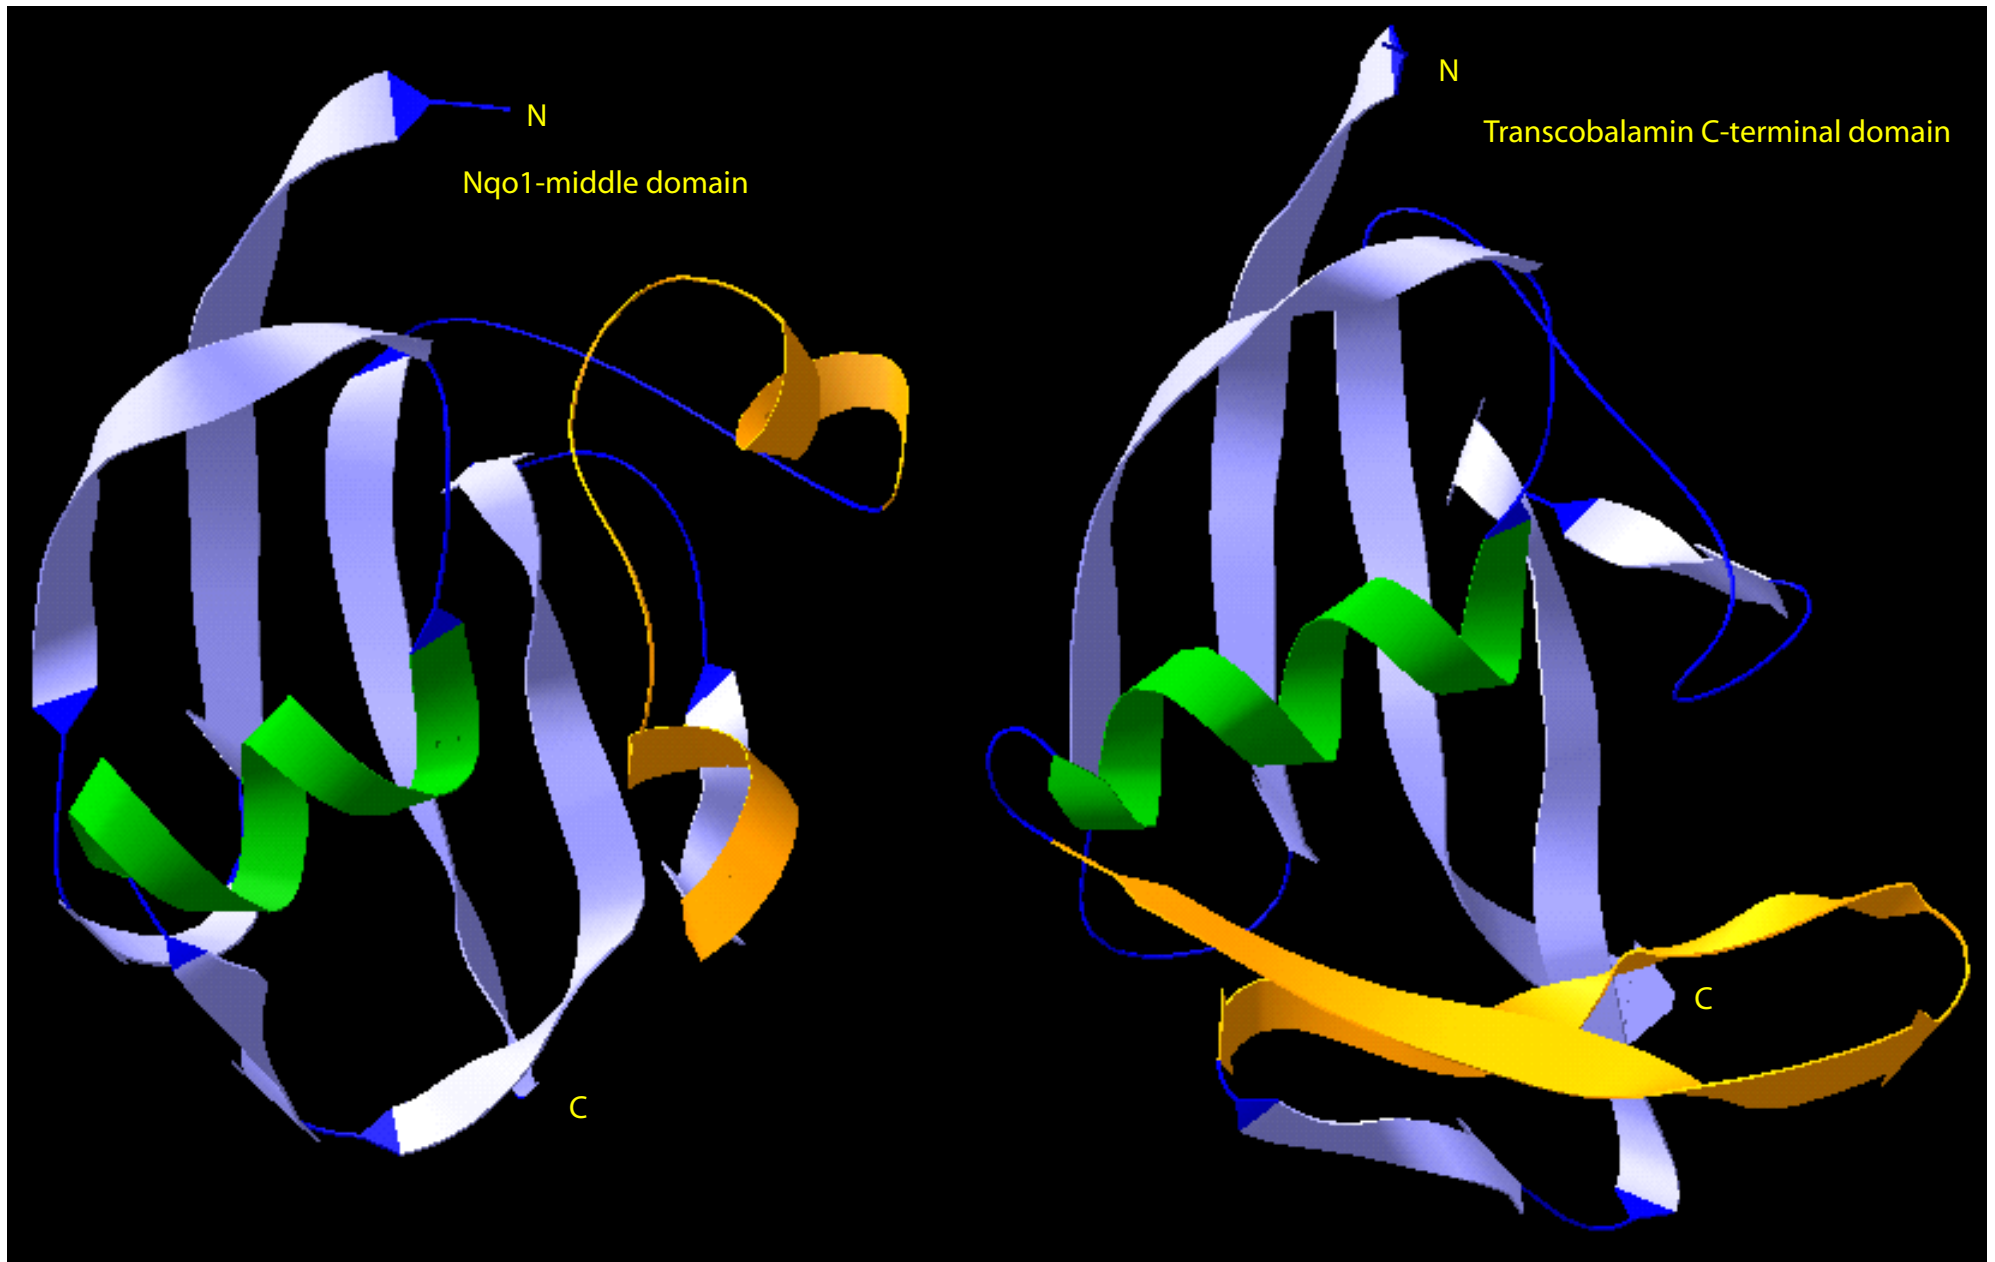

Supplement: 1745-6150-2-4-S1.pdf [file 1745-6150-2-4-S1.pdf]
